# Supplementary material
Source: HighWire-hosted journal article supplement (https://www.highwirestage.com/highwire/filestream/77701/field_highwire_adjunct_files/0/20-00043.pdf)
Supplement: 20-00043.pdf [file 20-00043.pdf]

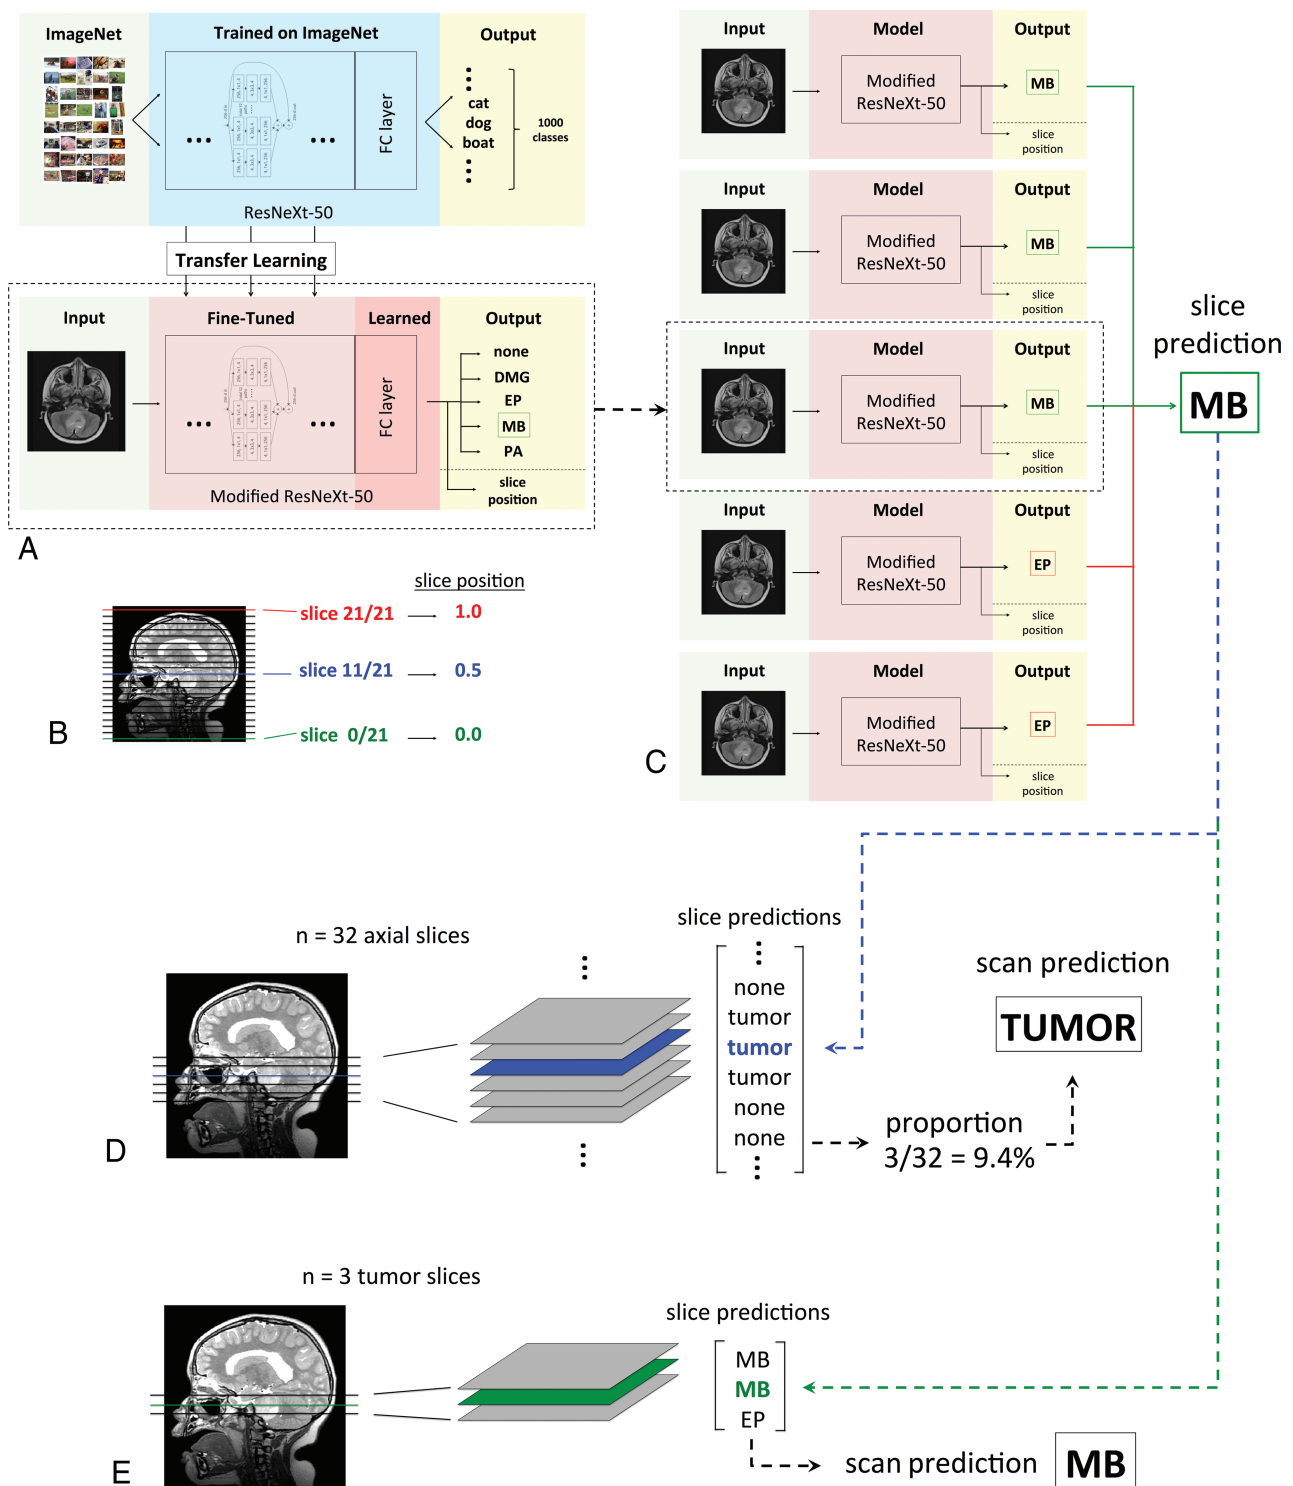

**ON-LINE FIG 1.** Deep learning model architecture consisting of a modified ResNeXt-50 pretrained on ImageNet and fine-tuned to classify individual axial slices as no tumor, MB, PF, EP, or DMG (A). The addition of multitask learning to predict relative slice position improves performance (B). The top 5 performing models are combined to create a final ensemble model for slice-level classification (C). Individual slice predictions are aggregated to generate scan-level predictions for tumor detection if the proportion of tumor slices exceeded a certain threshold (D). For scans with tumors, tumor subclass is determined on the basis of a confidence-weighted majority vote across all tumor slices (E).

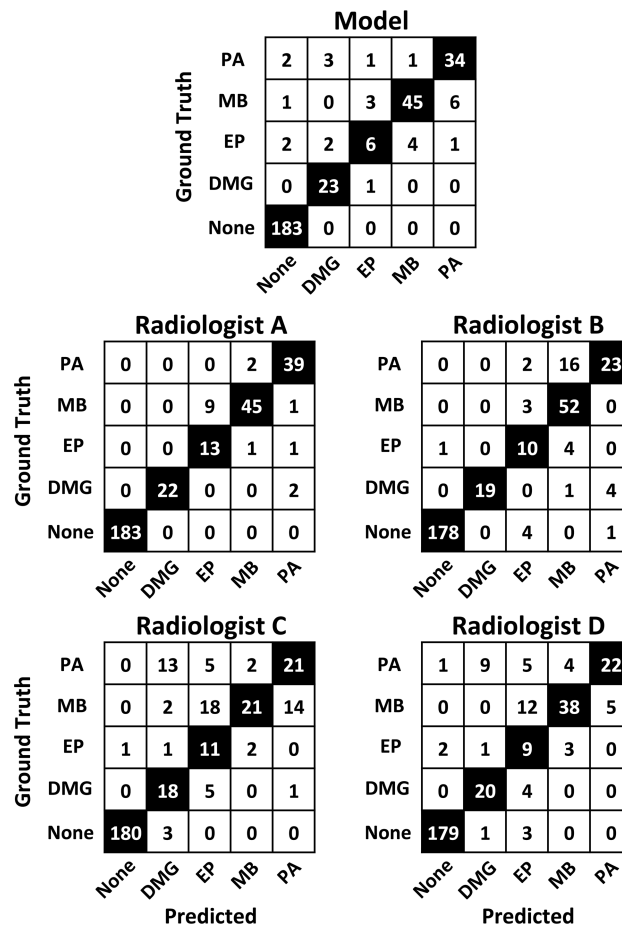

**ON-LINE FIG 2.** Confusion matrices showing model and radiologists' predictions compared with ground truth.

**On-line Table 1: Loss contribution of relative-slice position error on slice-level classification accuracy on validation set scans with tumors<sup>a</sup>**

| Loss Contribution | Slice-Level Accuracy | F <sub>1</sub> Score | False-Negative Proportion |
|-------------------|----------------------|----------------------|---------------------------|
| 0                 | 0.76                 | 0.70                 | 0.03                      |
| 10%               | 0.80                 | 0.70                 | 0.01                      |
| 20%               | 0.72                 | 0.70                 | 0.01                      |

<sup>a</sup> False-negative proportion indicates the proportion of scans analyzed by the model that were falsely determined to have no positive tumor slices.

**On-line Table 2: Comparison of T2 and T1-T2-ADC performance on validation-set tumor classification**

| Sequence  | F <sub>1</sub> (Slice-Level) | F <sub>1</sub> (Scan-Level) | Accuracy | False-Negative Proportion |
|-----------|------------------------------|-----------------------------|----------|---------------------------|
| T2        | 0.62                         | 0.74                        | 0.77     | 0.00                      |
| T1-T2-ADC | 0.46                         | 0.47                        | 0.54     | 0.12                      |

**On-line Table 3: Model classification and detection results on the held-out test dataset**

| Model            | Classification Accuracy | Classification F <sub>1</sub> Score | Detection Sensitivity | Detection Specificity | Detection AUROC |
|------------------|-------------------------|-------------------------------------|-----------------------|-----------------------|-----------------|
| Single (top 1)   | 0.82                    | 0.69                                | 0.99                  | 0.85                  | 0.99            |
| Ensemble (top 5) | 0.92                    | 0.80                                | 0.96                  | 1.00                  | 0.99            |

**Note:**—AUROC indicates Area Under the Receiver Operating Characteristic curve.
